# Supplementary material for: Using polysorbate 40-stabilized gold nanoparticles in colorimetric assays of hydrogen cyanide in cyanogenic glycoside-containing plants
Source: Royal Society of Chemistry journal article supplement (doi:10.1039/c2ay25291k), 2012-01-01
Supplement: c2ay25291k.pdf [file c2ay25291k.pdf]

## **Electronic Supplementary Material**

### **Polysorbate 40-Stabilized Gold Nanoparticles for Colorimetric Assay for Cyanogenic Glycoside in Plant**

Cheng-Yu Liu and Wei-Lung Tseng\*

Department of Chemistry, National Sun Yat-sen University, Taiwan

Correspondence: Dr. Wei-Lung Tseng, Department of Chemistry, National Sun  
Yat-sen University, 70, Lien-hai Road, Kaohsiung, Taiwan 804.

E-mail: [tsengwl@mail.nsysu.edu.tw](mailto:tsengwl@mail.nsysu.edu.tw)

Fax: 011-886-7-3684046.

Linamarin

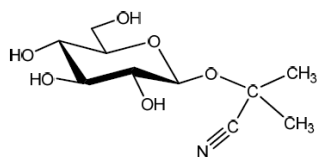

Prunasin

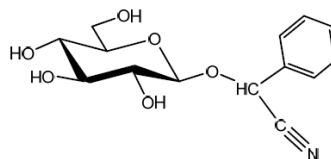

Amygdalin

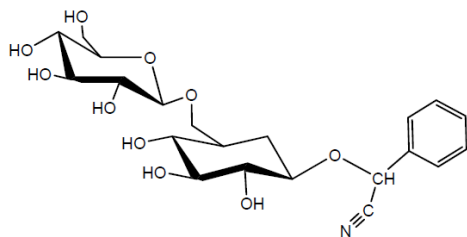

**Fig. S1.** Chemical structures of linamarin, prunasin, and amygdalin.

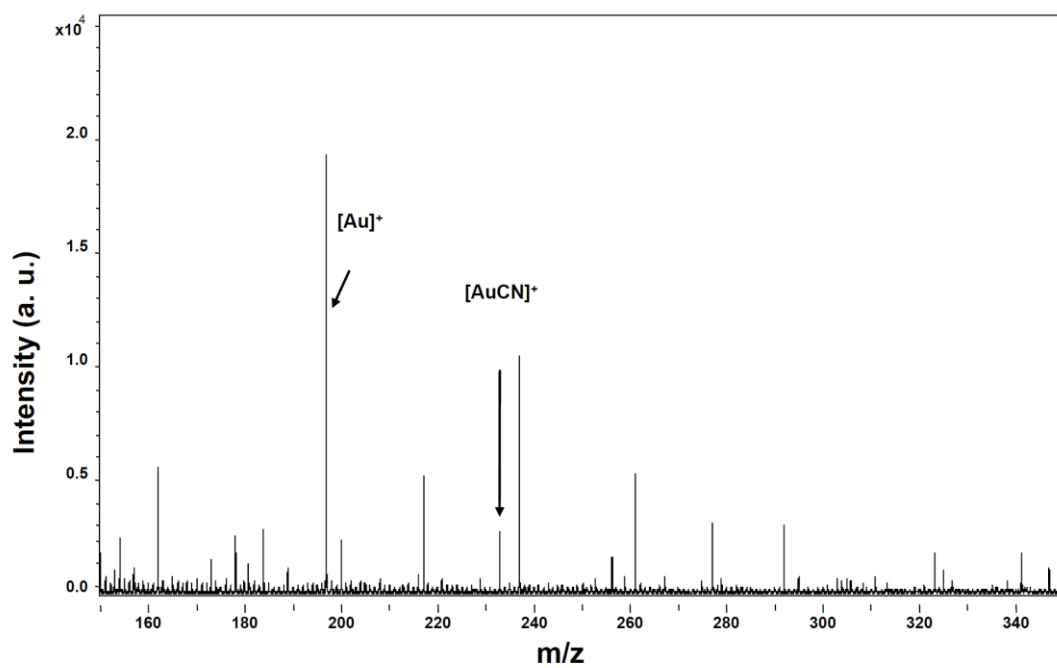

**Fig. S2.** SALDI spectrum of a solution of 5x PBS, 1 nM PS 40-AuNPs and 5  $\mu$ M cyanide.

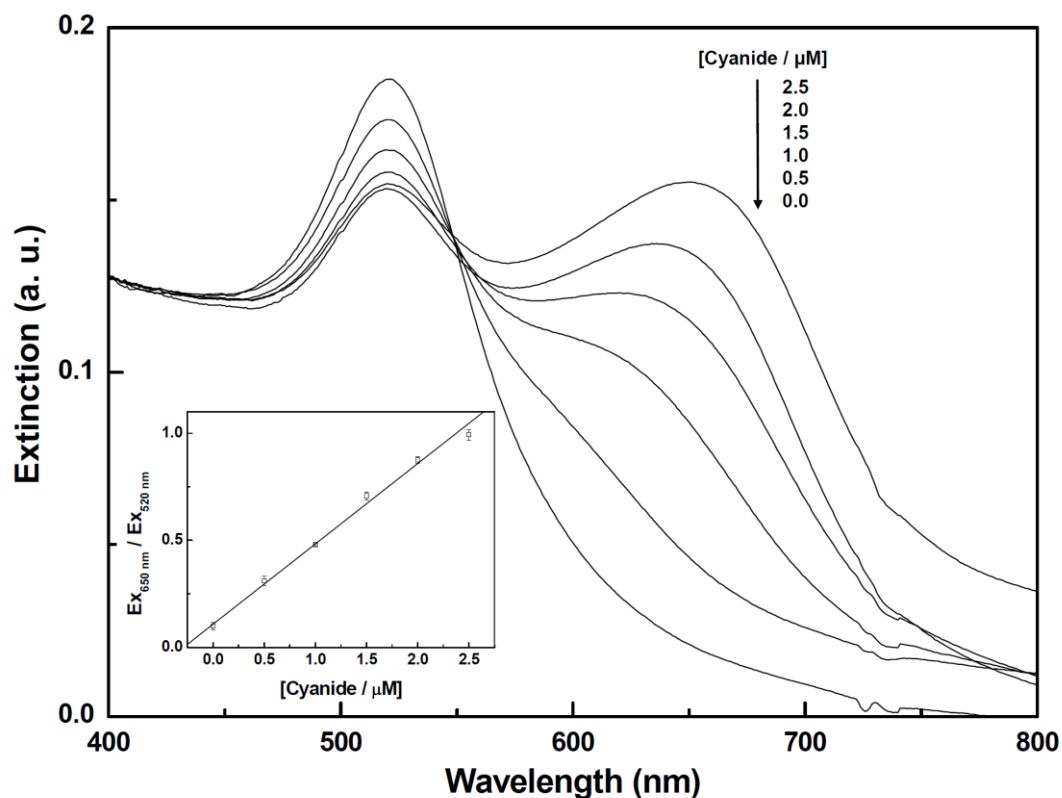

**Fig. S3.** Determination of cyanide content in loquat kernel (0.2 g) using PS 40-AuNPs. Samples were ground into powders and then incubated with deionized water for 1 h. After centrifugation, the supernatants containing released cyanide were spiked with standard solutions of 0–625  $\mu\text{M}$  cyanide. The resulting solutions were diluted to 250-fold with deionized water. A portion of the solution was incubated with a solution containing 5x PBS and 1 nM PS 40-AuNPs for 30 min. Inset: a plot of  $\text{Ex}_{600 \text{ nm}}/\text{Ex}_{520 \text{ nm}}$  versus the concentration of cyanide. The error bars represent standard deviations based on three independent measurements.

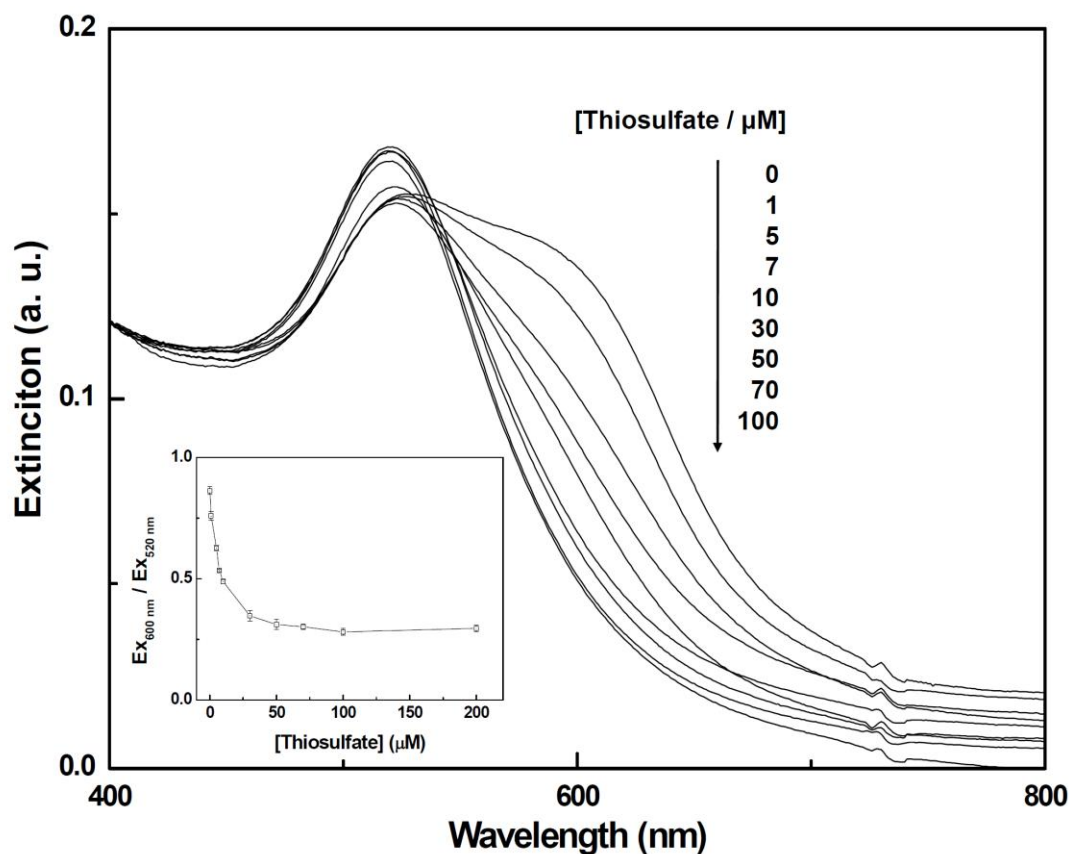

**Fig. S4.** Effect of the concentration of thiosulfate on the detoxification of the released cyanide from peach kernel (2 g). Samples were ground into powders and then incubated with deionized water for 1 h. After centrifugation, the supernatants were diluted to 10-fold with deionized water. A portion of the solution (180  $\mu\text{L}$ ) was reacted with a 20  $\mu\text{L}$  of 0–200  $\mu\text{M}$  thiosulfate for 10 min. The resulting solution incubated with a solution containing 5x PBS and 1 nM PS 40-AuNPs for 30 min.

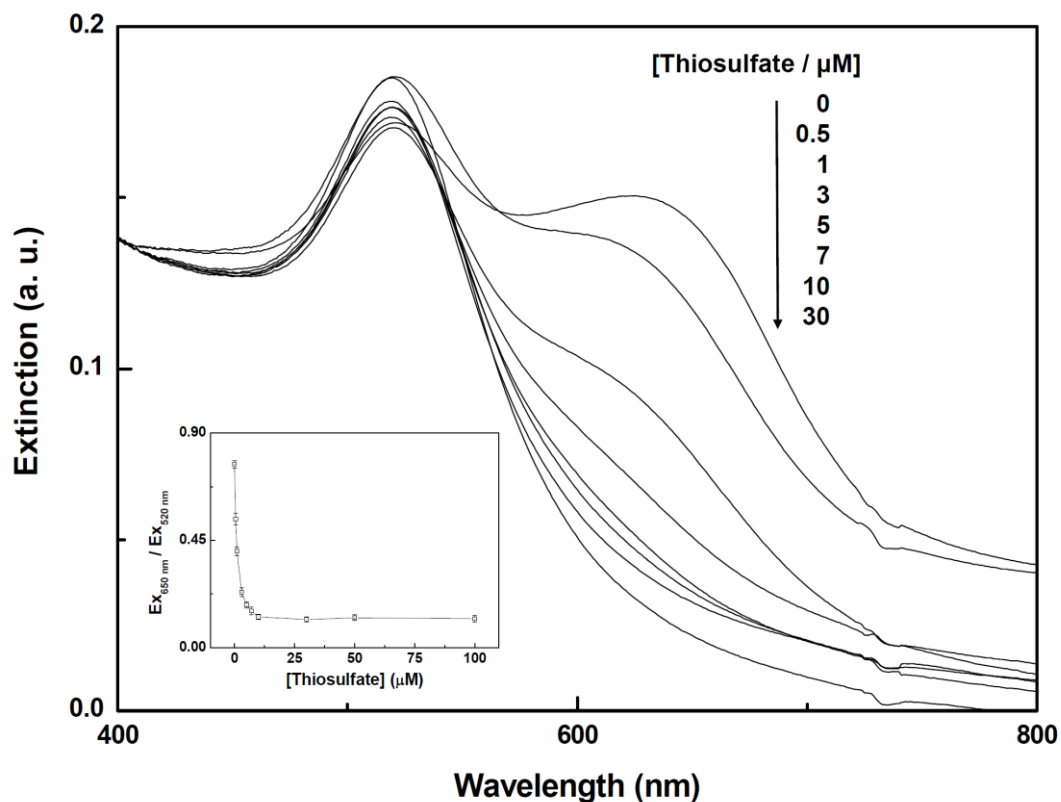

**Fig. S5.** Effect of the concentration of thiosulfate on the detoxification of the released cyanide from loquat kernel (0.2 g). Samples were ground into powders and then incubated with deionized water for 1 h. After centrifugation, the supernatants were diluted to 100-fold with deionized water. A portion of the solution (180  $\mu\text{L}$ ) was reacted with a 20  $\mu\text{L}$  of 0–100  $\mu\text{M}$  thiosulfate for 10 min. The resulting solution incubated with a solution containing 5x PBS and 1 nM PS 40-AuNPs for 30 min.
